# Supplementary material for: Afatinib radiosensitizes head and neck squamous cell carcinoma cells by targeting cancer stem cells
Source: PubMed Central journal article supplement (PMC5400558; doi:10.18632/oncotarget.15468), 2017-02-18
Supplement: oncotarget-08-20961-s001.pdf [file oncotarget-08-20961-s001.pdf]

## Afatinib radiosensitizes head and neck squamous cell carcinoma cells by targeting cancer stem cells

### Supplementary Materials

**Supplementary Table 1: List of antibodies used in the study**

| S.No | Antibody Catalog            | Catalog   | Vendor                    | Dilution |
|------|-----------------------------|-----------|---------------------------|----------|
| 1    | EGFR (D38B1)                | MA#4267   | Cell Signaling Technology | 1:1000   |
| 2    | pEGFR (Y1068)               | #3777     | Cell Signaling Technology | 1:1000   |
| 3    | tHER2                       | SC-134481 | Santa Cruz Biotechnology  | 1:1000   |
| 4    | pHER2(Y1248)                | #2247S    | Cell Signaling Technology | 1:1000   |
| 5    | tHER3                       | SC-8050   | Santa Cruz Biotechnology  | 1:1000   |
| 6    | tHER4                       | SC-285    | Santa Cruz Biotechnology  | 1:500    |
| 7    | pAkt (S473)                 | #4060X    | Cell Signaling Technology | 1:1000   |
| 8    | AKT                         | #4691L    | Cell Signaling Technology | 1:1000   |
| 9    | ERK1/2 (MK1)                | SC-135900 | Santa Cruz Biotechnology  | 1:500    |
| 10   | p-ERK1/2 (T202/Y204)        | #9101L    | Cell Signaling Technology | 1:1000   |
| 11   | pFAK (Y397)                 | SC11765-R | Santa Cruz Biotechnology  | 1:1000   |
| 12   | pP38 MAPK (Thr-108/Tyr-182) | #9211     | Cell Signaling Technology | 1:1000   |
| 13   | pP38 MAPK                   | #9212     | Cell Signaling Technology | 1:1000   |
| 14   | pATM (Ser-1981)             | #9947S    | Cell Signaling Technology | 1:1000   |
| 15   | pCHK2 (Thr-68)              | #9947S    | Cell Signaling Technology | 1:1000   |
| 16   | pBRCA1 (Ser-1524)           | #9947S    | Cell Signaling Technology | 1:1000   |
| 17   | pATR (Ser-428)              | #9947S    | Cell Signaling Technology | 1:1000   |
| 18   | PγH2A (Ser-139)             | #9947S    | Cell Signaling Technology | 1:1000   |
| 19   | ZO-1                        | #9782S    | Cell Signaling Technology | 1:1000   |
| 20   | Snail                       | #9782S    | Cell Signaling Technology | 1:1000   |
| 21   | Slug                        | #9782S    | Cell Signaling Technology | 1:1000   |
| 22   | pFAK (Tyr-925)              | #3284     | Cell Signaling Technology | 1:1000   |
| 23   | tFAK                        | SC-271195 | Santa Cruz Biotechnology  | 1:1000   |
| 24   | CyclinD1                    | SC-753    | Santa Cruz Biotechnology  | 1:1000   |
| 25   | Cyclin A                    | SC-751    | Santa Cruz Biotechnology  | 1:1000   |
| 26   | Cyclin B1                   | SC-594    | Santa Cruz Biotechnology  | 1:1000   |
| 27   | ALDH1/2                     | SC-50385  | Santa Cruz Biotechnology  | 1:1000   |
| 28   | CD24                        | SC-11406  | Santa Cruz Biotechnology  | 1:1000   |
| 29   | β-actin                     | A2228     | Sigma-Aldrich             | 1:5000   |
